# Supplementary material for: Requirement for BUB1B/BUBR1 in tumor progression of lung adenocarcinoma
Source: PubMed Central journal article supplement (PMC4426948; doi:10.18632/genesandcancer.53), 2015-03
Supplement: ganc-06-106-s001.pdf [file ganc-06-106-s001.pdf]

# Requirement for BUB1B/BUBR1 in tumor progression of lung adenocarcinoma

## Supplementary Material

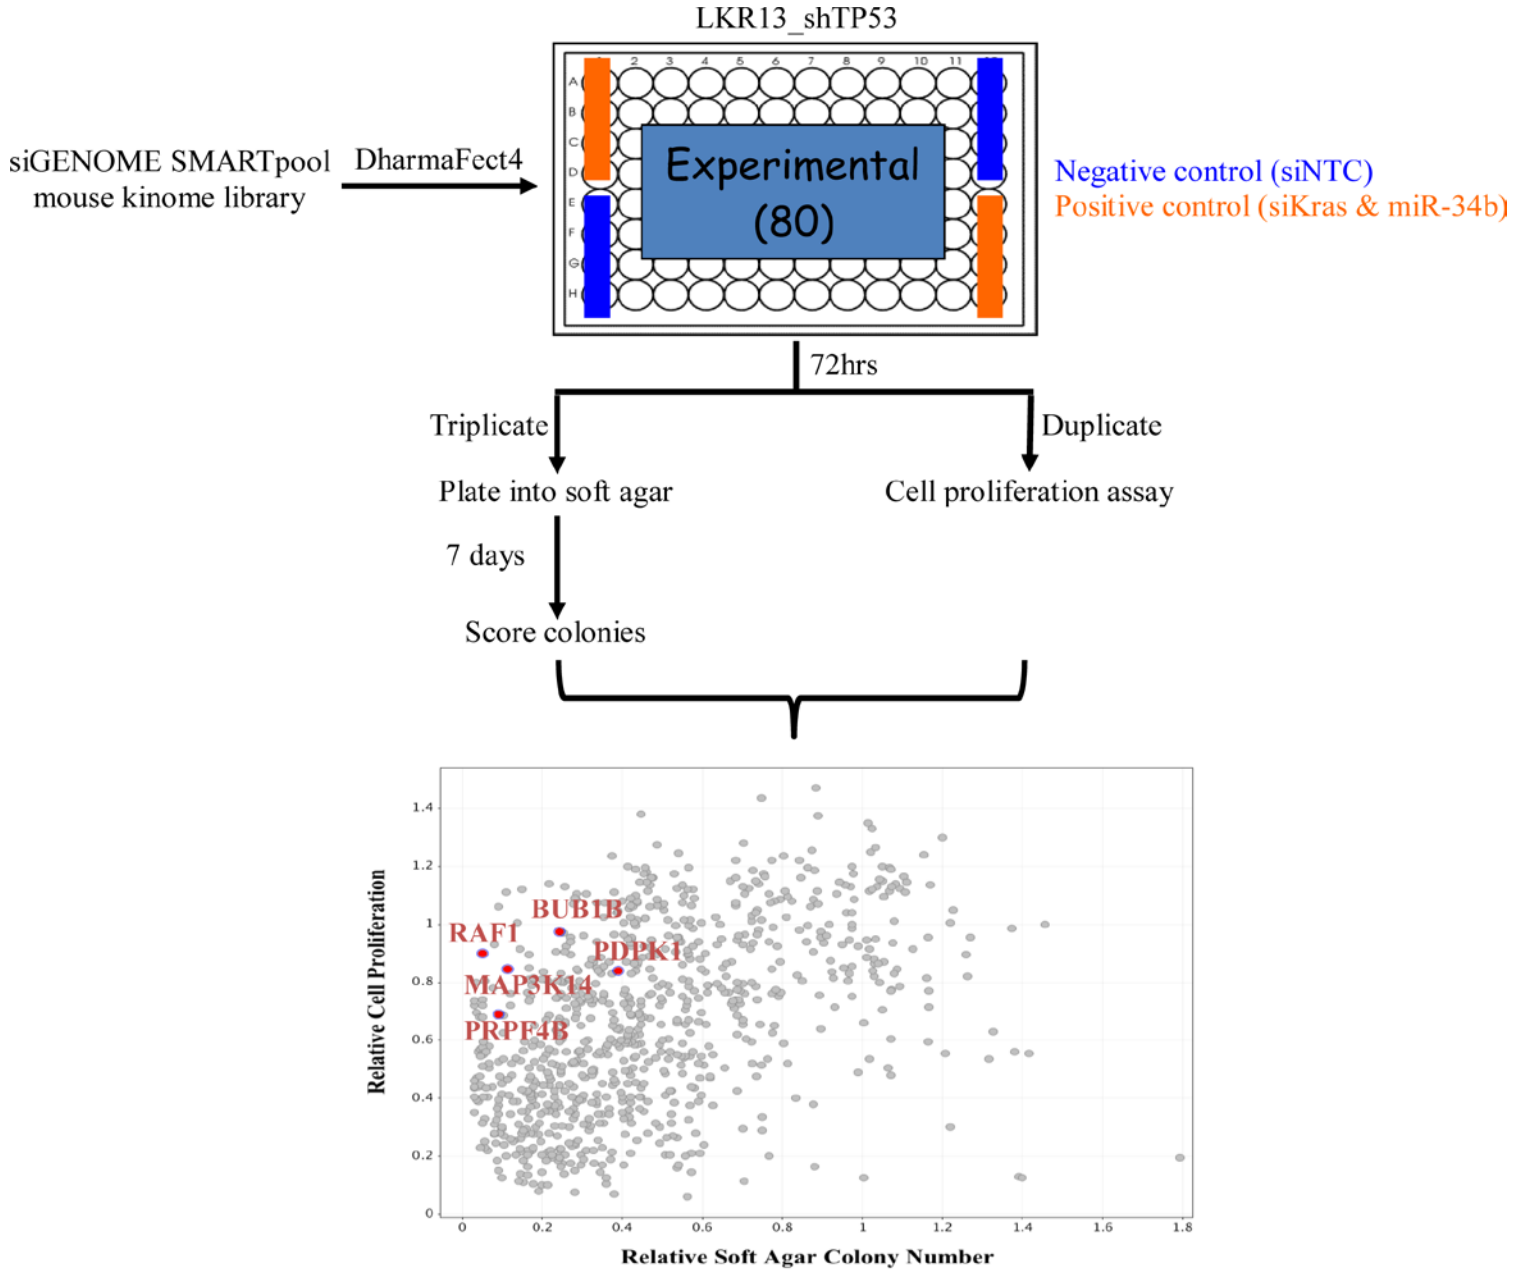

**Supplemental Figure S1. Schematic overview of mouse kinome siRNA screen.** See Materials and Methods for detailed description. Cell proliferation and soft agar colony numbers were shown as relative values normalized to the siNTC control. The five top hits are highlighted.

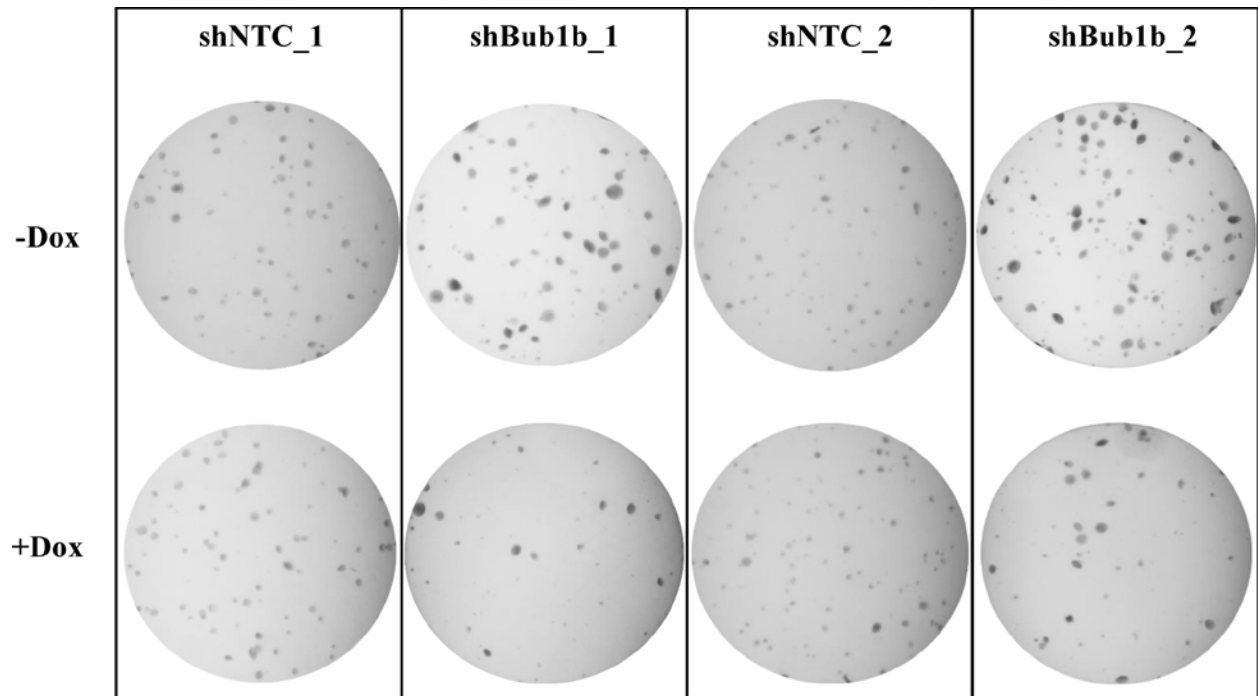

**Supplemental Figure S2: Representative images of soft agar colonies formed by LKPH2 stable cell lines expressing the indicated inducible shRNAs.**

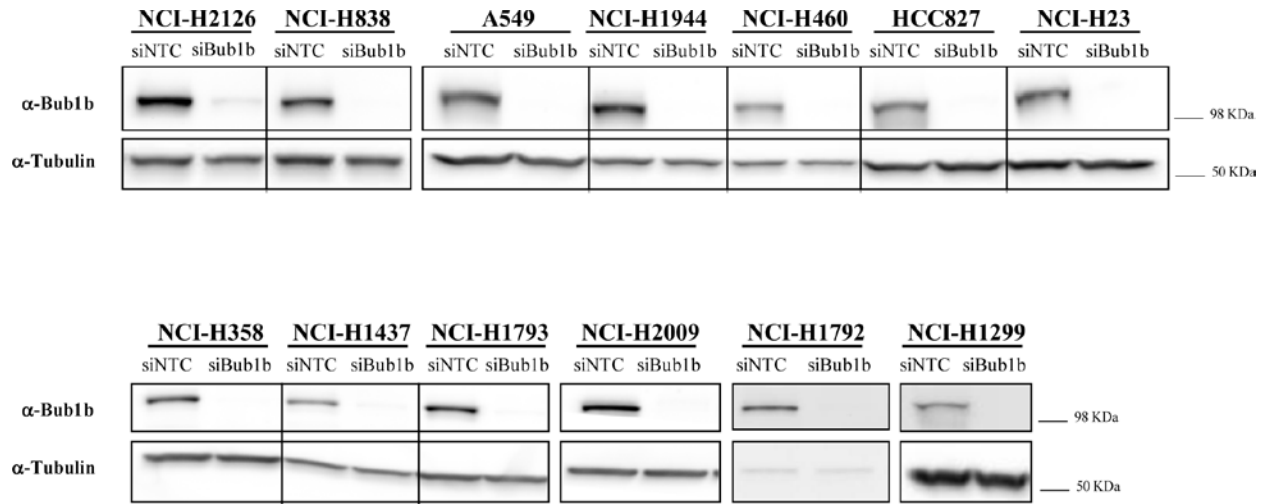

**Supplemental Figure S3: BUB1B knockdown in human lung adenocarcinoma cell lines.**

Proteins were collected 72 hours after transfection with siNTC or human siBub1b OTP

SMARTpool.

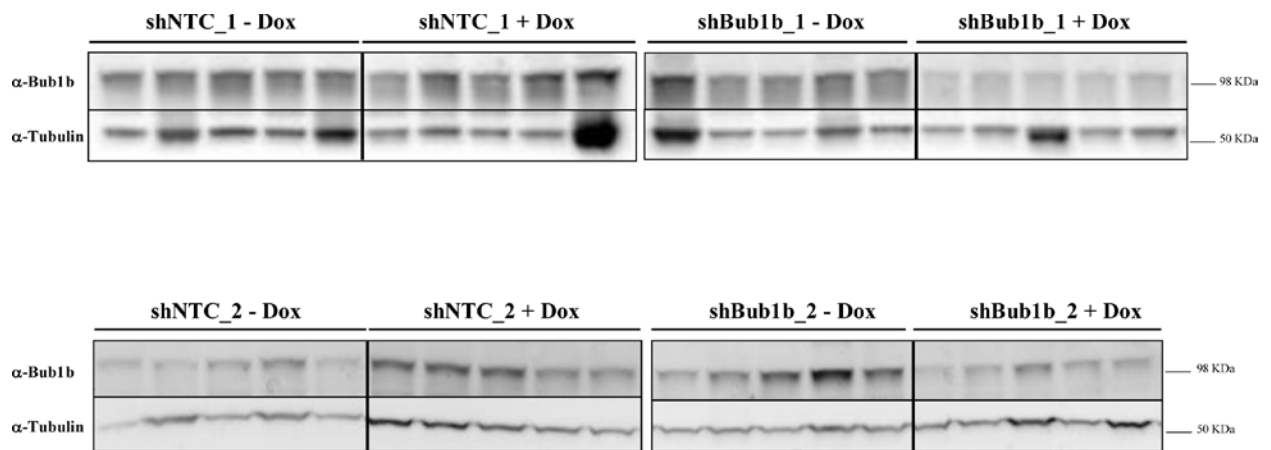

**Supplemental Figure S4: BUB1B knockdown in allograft tumors.** Tumors were harvested at the end of study.

BUB1B protein levels in five tumors from each group are shown.

## Day 0 of intervention setting

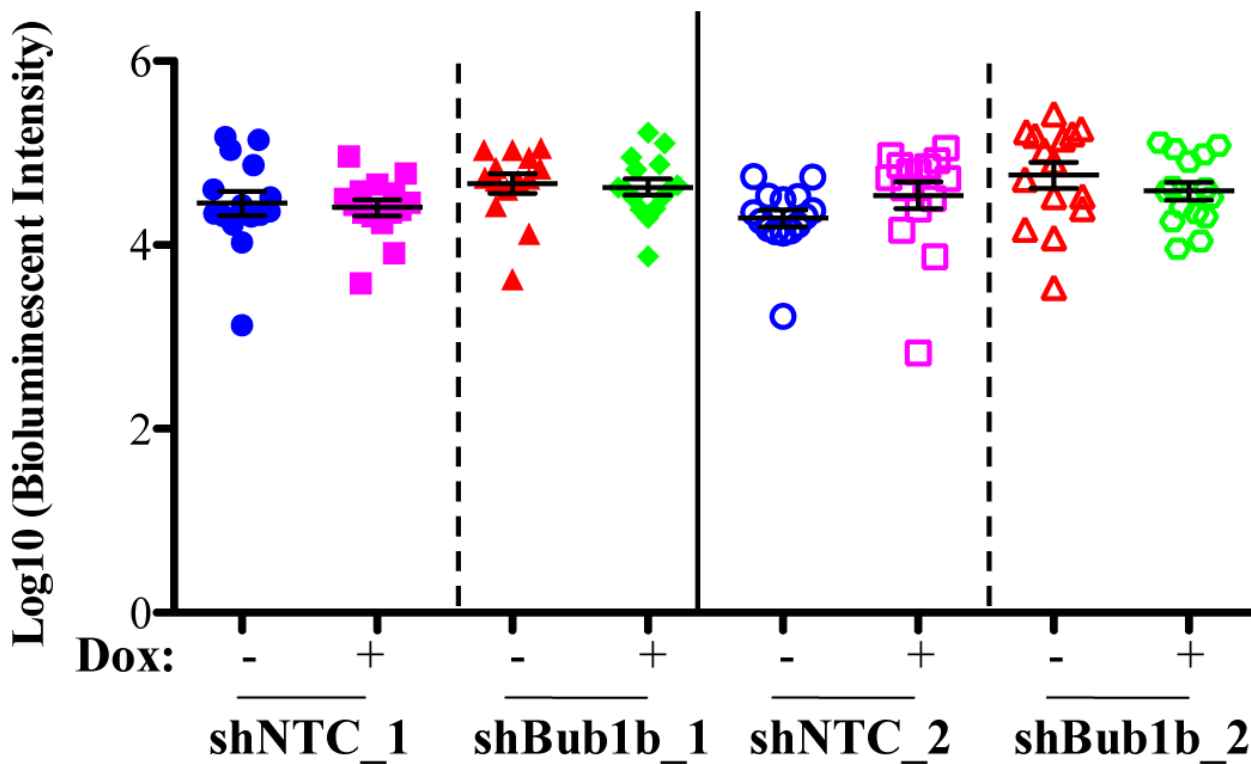

Supplemental Figure S5: Equivalent tumor burden in mice from all experimental groups at the beginning of intervention setting in the tail vein injection mouse model. Quantification of whole body tumor burden by *in vivo* bioluminescence imaging at day 16 post LKPH2 cell injection.

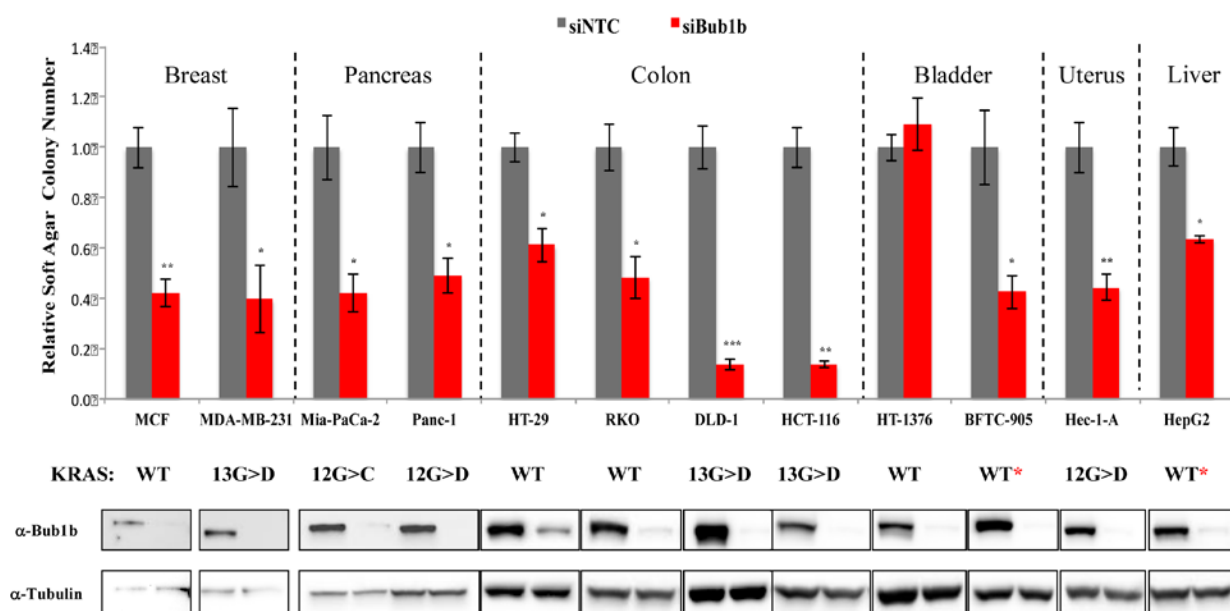

**Supplemental Figure S6: Soft agar colony formation and BUB1B knockdown in additional human cancer cell lines transfected with siNTC or human siBub1b OTP SMARTpool.** Colony numbers were shown as relative values normalized to siNTC controls. Mean±SEM was calculated from two to three independent experiments. \*\*\* indicates  $p < 0.001$ , \*\*  $p < 0.01$ , \*  $p < 0.05$ . Cancer type and *KRAS* status for each cell line are shown above and below each panel, respectively. WT, wild type. A red asterisk indicates the cell line contains *NRAS* 61Q>L mutation. Proteins were collected 72 hours after transfection.

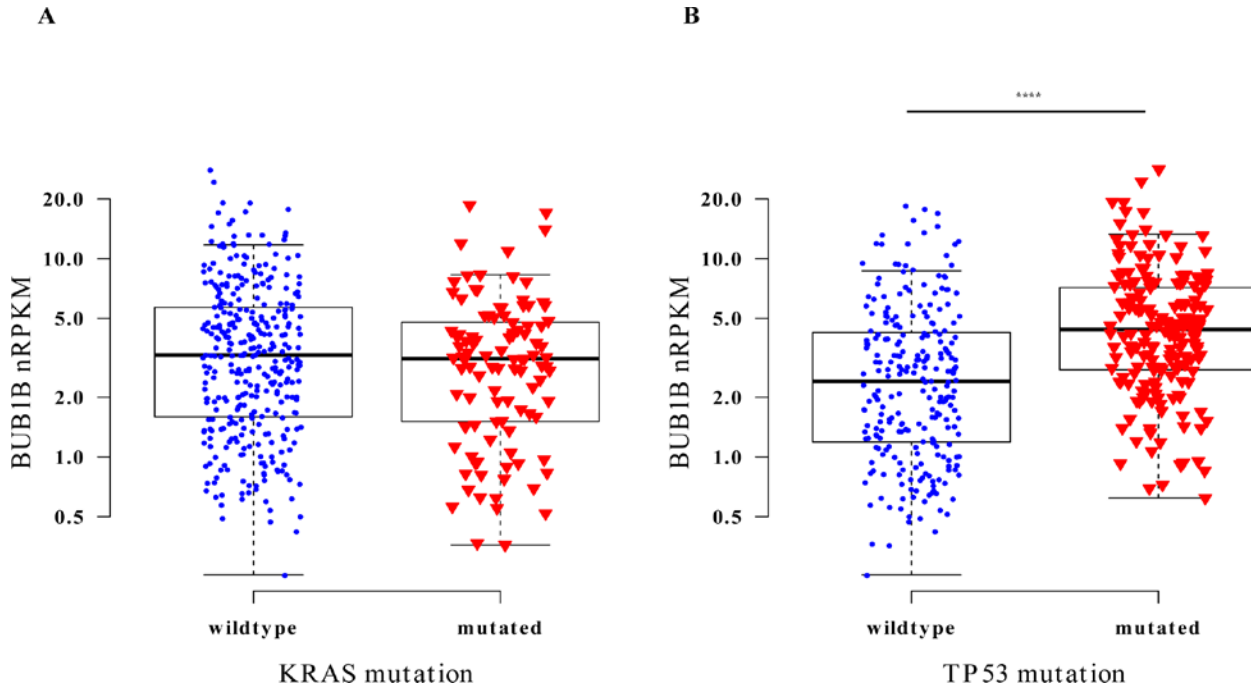

**Supplemental Figure S7: Expression of *BUB1B* in TCGA lung adenocarcinoma patients with varied *KRAS* and *TP53* status.** Boxplots of *BUB1B* mRNA expression levels in function of *KRAS* (A) and *TP53* (B) mutation status for 448 lung adenocarcinoma samples from TCGA with both RNA-seq and exome-seq data. *KRAS/TP53* mutations only include somatic, protein-altering mutations. \*\*\*\* indicates  $p < 0.0001$ .

**Supplemental Table S1: Lung adenocarcinoma cell lines**

| Name      | Tissue species | KRAS mutation status | TP53 mutation status | Source [reference]                                                                                       |
|-----------|----------------|----------------------|----------------------|----------------------------------------------------------------------------------------------------------|
| LKR13     | Mouse          | Mutant 12G>D         | Wild type            | Lung tumors from <i>Kras</i> <sup>LSL-G12D/+</sup> mouse [8]                                             |
| LKPH2     | Mouse          | Mutant 12G>D         | Null <sup>a</sup>    | Lung tumors from <i>Kras</i> <sup>LSL-G12D/+</sup> ; <i>Trp53</i> <sup>Flox/+</sup> mouse [9]            |
| LKP9      | Mouse          | Mutant 12G>D         | Null                 | Lung tumors from <i>Kras</i> <sup>LSL-G12D/+</sup> ; <i>Trp53</i> <sup>Frt/Frt+</sup> mouse <sup>b</sup> |
| NCI-H1437 | Human          | Wild type            | Mutant               | Genentech Cell Line Repository                                                                           |
| NCI-H1793 | Human          | Wild type            | Mutant               | Genentech Cell Line Repository                                                                           |
| NCI-H2126 | Human          | Wild type            | Mutant               | Genentech Cell Line Repository                                                                           |
| NCI-H838  | Human          | Wild type            | Mutant               | Genentech Cell Line Repository                                                                           |
| HCC827    | Human          | Wild type            | Mutant               | Genentech Cell Line Repository                                                                           |
| NCI-H1299 | Human          | Wild type            | Null                 | Genentech Cell Line Repository                                                                           |
| NCI-H358  | Human          | Mutant 12G>C         | Null                 | Genentech Cell Line Repository                                                                           |
| NCI-H1792 | Human          | Mutant 12G>C         | Mutant               | Genentech Cell Line Repository                                                                           |
| NCI-H23   | Human          | Mutant 12G>C         | Mutant               | Genentech Cell Line Repository                                                                           |
| NCI-H2009 | Human          | Mutant 12G>A         | Mutant               | Genentech Cell Line Repository                                                                           |
| A549      | Human          | Mutant 12G>S         | Wild type            | Genentech Cell Line Repository                                                                           |
| NCI-H1944 | Human          | Mutant 13G>D         | Wild type            | Genentech Cell Line Repository                                                                           |
| NCI-H460  | Human          | Mutant 61Q>H         | Wild type            | Genentech Cell Line Repository                                                                           |

a. Genomic analysis revealed that the LKPH2 cell line had undergone loss of heterozygosity and become *Trp53* null.

b. Genentech unpublished data



**Supplemental Table S2: RNAi target sequences**

| Name                                   | Supplier  | Catalog #        | Sequence (sense, 5'→3')  |
|----------------------------------------|-----------|------------------|--------------------------|
| Mouse <i>Bub1b</i> siRNA OTP SMARTpool | Dharmacon | L-044095-00-0005 | See manufacturer website |
| Human <i>BUB1B</i> siRNA OTP SMARTpool | Dharmacon | L-004101-00-0005 | See manufacturer website |
| OTP non-targeting control (siNTC)      | Dharmacon | D-001810-01-50   | See manufacturer website |
| OTP siBub1b_1                          | Dharmacon | Custom           | TAGCAGACCTAGCGCACTT      |
| OTP siBub1b_2                          | Dharmacon | Custom           | AGGATGTGTCTCCCGATATTT    |
| shNTC_1 <sup>a</sup>                   | Genentech | N/A              | TTAGTCGACATGTAAACCGCT    |
| shNTC_2                                | Genentech | N/A              | CAACAAGATGAAGAGCACCAA    |
| shBub1b_1 <sup>a</sup>                 | Genentech | N/A              | TAGCAGACCTAGCGCACTT      |
| shBub1b_2                              | Genentech | N/A              | AGGATGTGTCTCCCGATATTT    |
| shTP53                                 | Genentech | N/A              | CAGTCTACTTCCCGCCATA      |

a. shNTC\_1 and shBub1b\_1 share the same hairpin design that is different from the one shared by shNTC\_2, shBub1b\_2 and shTP53.

**Supplemental Table S3: Antibodies**

| Protein                                                   | Supplier       | Catalog # |
|-----------------------------------------------------------|----------------|-----------|
| BUB1B                                                     | Abcam          | ab28193   |
| Flag (clone M2)                                           | Sigma-Aldrich  | A8592     |
| $\alpha$ -Tubulin                                         | Sigma-Aldrich  | T5168     |
| Mouse IgG HRP conjugated                                  | Amersham       | NA931     |
| Rabbit IgG HRP conjugated                                 | Amersham       | NA934     |
| Sheep IgG HRP conjugated                                  | Abcam          | ab97125   |
| Cleaved caspase-3 (Asp175) (D3E9) Pacific Blue conjugated | Cell Signaling | 8788      |
